# Supplementary material for: Galactose-functionalized multi-responsive nanogels for hepatoma-targeted drug delivery
Source: Royal Society of Chemistry journal article supplement (doi:10.1039/c4nr06714b), 2015-01-01
Supplement: c4nr06714b1.pdf [file c4nr06714b1.pdf]

**Table S1 Zeta potential(mV) of DOX-loaded P(ODGal-VCL-MAA) nanogels**

|                       | Zeta potential(mV) |        |        |        |
|-----------------------|--------------------|--------|--------|--------|
|                       | pH 5.0             | pH 6.0 | pH 7.4 | pH 8.0 |
| DOX- P(ODGal-VCL-MAA) | -1.62              | -6.47  | -7.46  | -11.3  |

**In vitro cytotoxicity of P(ODGal-VCL-MAA) nanogels**

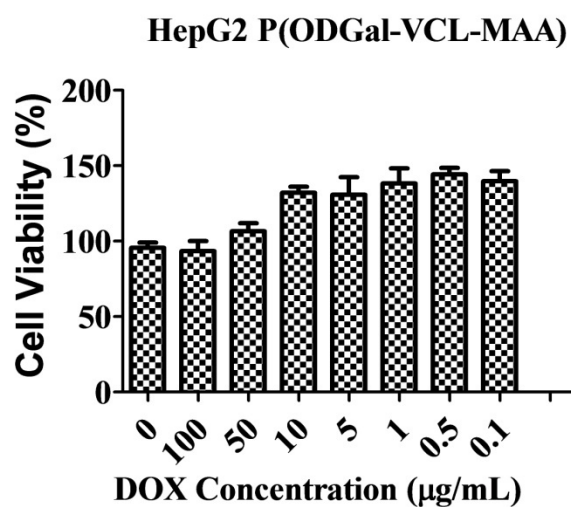

**Fig. S1.** Viability of HepG2 cells exposed with the P(ODGal-VCL-MAA) nanogels ( $\pm$ SD, n = 3).

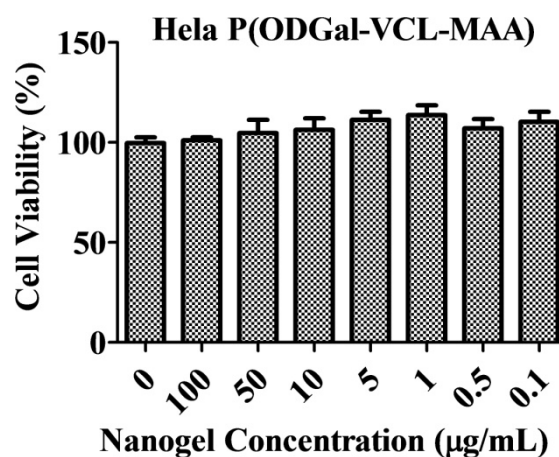

**Fig. S2.** Viability of Hela cells exposed with the P(ODGal-VCL-MAA) nanogels ( $\pm$ SD, n = 3).

---

As shown in Fig. S1 and Fig. S2, the empty nanogels exhibited nontoxic to both HepG2 and Hela cells, up to a tested concentration of 100  $\mu\text{g/mL}$ . It should be noted that cell viability in the presence of empty P(ODGal-VCL-MAA) nanogels was greater 100 % up to a copolymer concentration of 100  $\mu\text{g/mL}$ . This result indicates that the glycopolymers can be used as a biocompatible material.
